# Supplementary material for: Population genomics identifies a distinct Plasmodium vivax population on the China-Myanmar border of Southeast Asia
Source: PubMed Central journal article supplement (PMC7425983; doi:10.1371/journal.pntd.0008506), 2020-08-03
Supplement: pntd.0008506.s003.pdf [file pntd.0008506.s003.pdf]

**Supplemental Table 3. Regions removed due to high chances of mismapping.**

| <b>Chrom</b> | <b>Start</b> | <b>End</b> | <b>Explanation</b> | <i><b>Chrom</b></i> | <i><b>Start</b></i> | <i><b>End</b></i> | <i><b>Explanation</b></i> |
|--------------|--------------|------------|--------------------|---------------------|---------------------|-------------------|---------------------------|
| PvP01_12_v1  | 792292       | 818496     | MSP7               | <i>PvP01_01_v1</i>  | <i>0</i>            | <i>102166</i>     | <i>Subter1</i>            |
| PvP01_10_v1  | 1330765      | 1364791    | MSP3               | <i>PvP01_01_v1</i>  | <i>896664</i>       | <i>1021664</i>    | <i>Subter2</i>            |
| PvP01_01_v1  | 0            | 7914       | Subter1            | <i>PvP01_02_v1</i>  | <i>0</i>            | <i>95632</i>      | <i>Subter1</i>            |
| PvP01_01_v1  | 936372       | 1021664    | Subter2            | <i>PvP01_02_v1</i>  | <i>706327</i>       | <i>956327</i>     | <i>Subter2</i>            |
| PvP01_02_v1  | 0            | 145        | Subter1            | <i>PvP01_03_v1</i>  | <i>0</i>            | <i>100000</i>     | <i>Subter1</i>            |
| PvP01_02_v1  | 809467       | 956327     | Subter2            | <i>PvP01_03_v1</i>  | <i>807034</i>       | <i>896704</i>     | <i>Subter2</i>            |
| PvP01_03_v1  | 0            | 2435       | Subter1            | <i>PvP01_04_v1</i>  | <i>0</i>            | <i>200000</i>     | <i>Subter1</i>            |
| PvP01_04_v1  | 0            | 11544      | Subter1            | <i>PvP01_04_v1</i>  | <i>910822</i>       | <i>1012024</i>    | <i>Subter2</i>            |
| PvP01_04_v1  | 1001829      | 1012024    | Subter2            | <i>PvP01_05_v1</i>  | <i>0</i>            | <i>152481</i>     | <i>Subter1</i>            |
| PvP01_05_v1  | 0            | 4121       | Subter1            | <i>PvP01_05_v1</i>  | <i>1372333</i>      | <i>1524814</i>    | <i>Subter2</i>            |
| PvP01_05_v1  | 1508319      | 1524814    | Subter2            | <i>PvP01_06_v1</i>  | <i>0</i>            | <i>104279</i>     | <i>Subter1</i>            |
| PvP01_06_v1  | 1029030      | 1042791    | Subter2            | <i>PvP01_06_v1</i>  | <i>938512</i>       | <i>1042791</i>    | <i>Subter2</i>            |
| PvP01_07_v1  | 0            | 7803       | Subter1            | <i>PvP01_07_v1</i>  | <i>0</i>            | <i>165221</i>     | <i>Subter1</i>            |
| PvP01_07_v1  | 1474452      | 1652210    | Subter2            | <i>PvP01_07_v1</i>  | <i>1486989</i>      | <i>1652210</i>    | <i>Subter2</i>            |
| PvP01_08_v1  | 1648611      | 1761288    | Subter2            | <i>PvP01_08_v1</i>  | <i>0</i>            | <i>176128</i>     | <i>Subter1</i>            |
| PvP01_09_v1  | 0            | 183564     | Subter1            | <i>PvP01_08_v1</i>  | <i>1585160</i>      | <i>1761288</i>    | <i>Subter2</i>            |
| PvP01_09_v1  | 2235275      | 2237066    | Subter2            | <i>PvP01_09_v1</i>  | <i>0</i>            | <i>250000</i>     | <i>Subter1</i>            |
| PvP01_10_v1  | 0            | 5329       | Subter1            | <i>PvP01_09_v1</i>  | <i>2013360</i>      | <i>2237066</i>    | <i>Subter2</i>            |
| PvP01_10_v1  | 1517016      | 1548844    | Subter2            | <i>PvP01_10_v1</i>  | <i>0</i>            | <i>154884</i>     | <i>Subter1</i>            |
| PvP01_11_v1  | 2056852      | 2131221    | Subter2            | <i>PvP01_10_v1</i>  | <i>1393960</i>      | <i>1548844</i>    | <i>Subter2</i>            |
| PvP01_12_v1  | 0            | 5873       | Subter1            | <i>PvP01_11_v1</i>  | <i>0</i>            | <i>213122</i>     | <i>Subter1</i>            |
| PvP01_12_v1  | 3085629      | 3182763    | Subter2            | <i>PvP01_11_v1</i>  | <i>1918099</i>      | <i>2131221</i>    | <i>Subter2</i>            |
| PvP01_13_v1  | 0            | 23338      | Subter1            | <i>PvP01_12_v1</i>  | <i>0</i>            | <i>318276</i>     | <i>Subter1</i>            |
| PvP01_13_v1  | 1898648      | 2093556    | Subter2            | <i>PvP01_12_v1</i>  | <i>2864487</i>      | <i>3182763</i>    | <i>Subter2</i>            |
| PvP01_14_v1  | 3108714      | 3153402    | Subter2            | <i>PvP01_13_v1</i>  | <i>0</i>            | <i>209355</i>     | <i>Subter1</i>            |
|              |              |            |                    | <i>PvP01_13_v1</i>  | <i>1884201</i>      | <i>2093556</i>    | <i>Subter2</i>            |
|              |              |            |                    | <i>PvP01_14_v1</i>  | <i>0</i>            | <i>315340</i>     | <i>Subter1</i>            |
|              |              |            |                    | <i>PvP01_14_v1</i>  | <i>2838062</i>      | <i>3153402</i>    | <i>Subter2</i>            |

Italicized regions on the right were only removed during selection scans, where excessive loss of polymorphism from removal of high CV SNPs may result in selection bias.
