# Supplementary material for: Population genomics identifies a distinct Plasmodium vivax population on the China-Myanmar border of Southeast Asia
Source: PubMed Central journal article supplement (PMC7425983; doi:10.1371/journal.pntd.0008506), 2020-08-03
Supplement: pntd.0008506.s004.pdf [file pntd.0008506.s004.pdf]

**Supplemental Table 4. Fst values corrected for structure by condensing of IBD clusters.**

|                 | <b>CMB</b>                       | <b>Thailand</b>                  | <b>Cambodia</b>                     |
|-----------------|----------------------------------|----------------------------------|-------------------------------------|
| <b>Thailand</b> | 0.0190 ( <i>0.0186, 0.0195</i> ) |                                  |                                     |
| <b>Cambodia</b> | 0.0296 ( <i>0.0290, 0.0301</i> ) | 0.0137 ( <i>0.0136, 0.0138</i> ) |                                     |
| <b>Vietnam</b>  | 0.0309 ( <i>0.0303, 0.0316</i> ) | 0.0007 ( <i>0.0003, 0.0011</i> ) | -0.0095 ( <i>-0.0098, -0.0091</i> ) |
